# Supplementary material for: CAMKII as a therapeutic target for growth factor–induced retinal and choroidal neovascularization
Source: JCI Insight. 2019 Mar 21;4(6):e122442. doi: 10.1172/jci.insight.122442 (PMC6482993; doi:10.1172/jci.insight.122442)
Supplement: Supplemental data [file jciinsight-4-122442-s095.pdf]

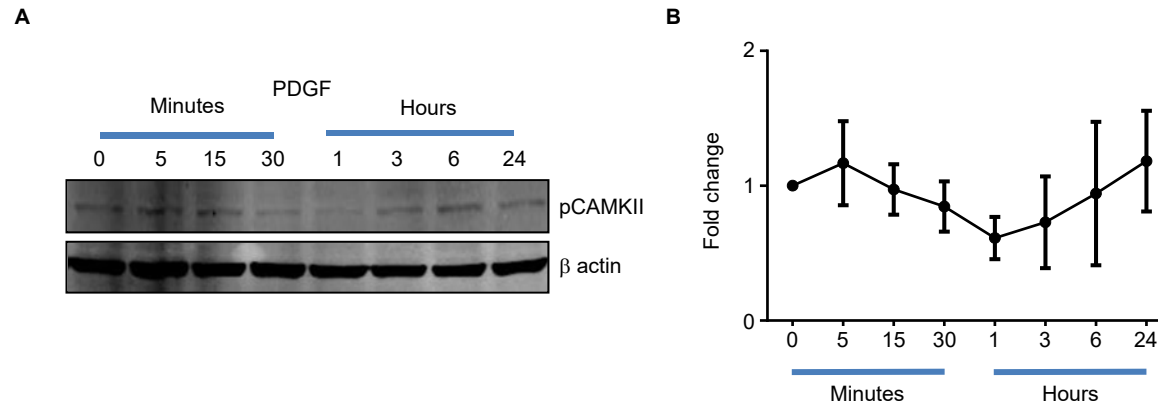

**Supplementary Figure 1. Effects of PDGF on  $\text{Ca}^{2+}$ /calmodulin-dependent kinase II (CAMKII) phosphorylation.** A, B. Representative western blot gels (A) and summary data (B) showing that PDGF failed to trigger CAMKII phosphorylation in human retinal microvascular endothelial cells. Data information: data represent mean  $\pm$  SEM; n=4 biological replicates.

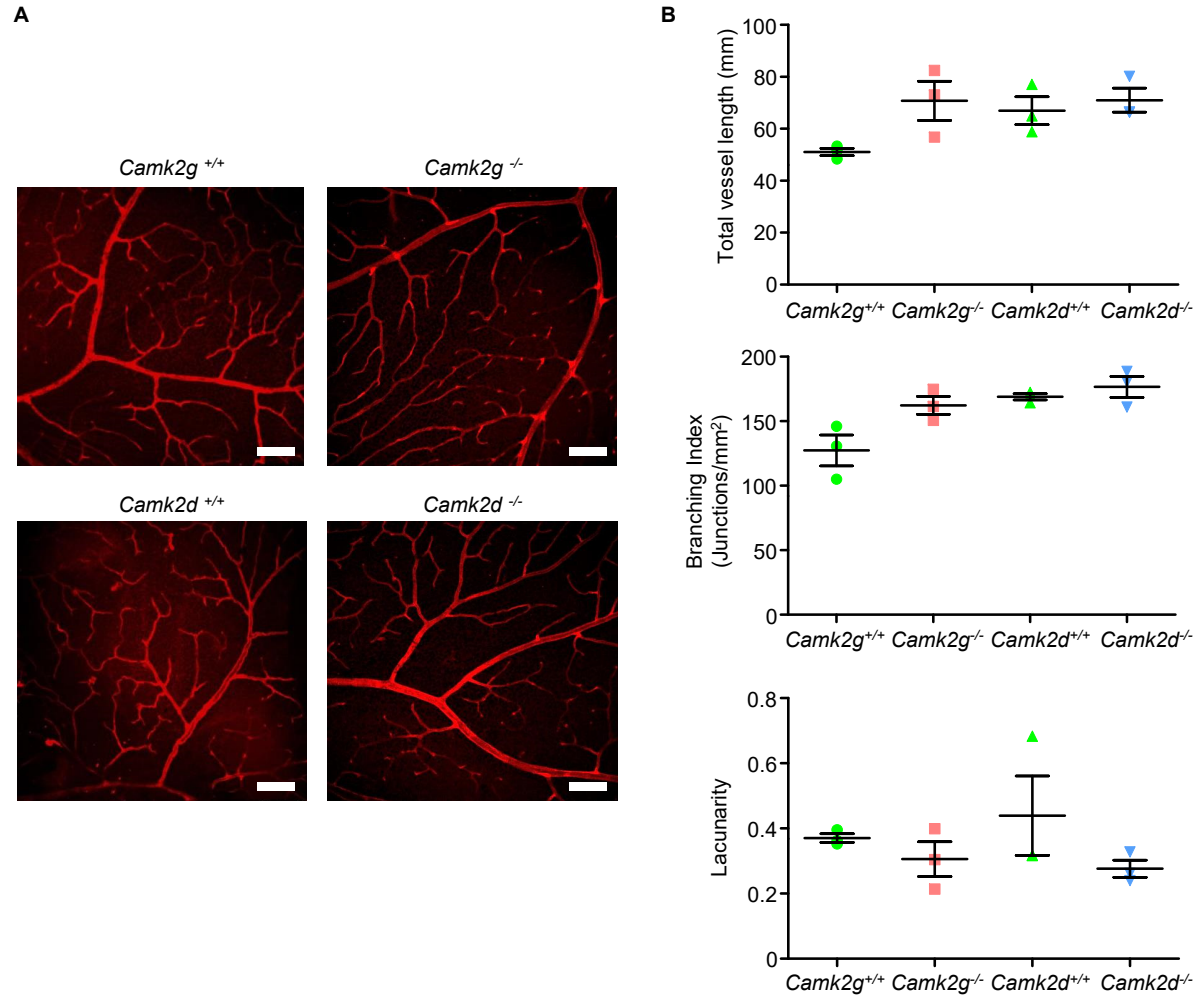

**Supplementary Figure 2. Retinal vascular network analysis in adult  $\text{Ca}^{2+}$ /calmodulin-dependent kinase II (CAMKII)  $\gamma$  and  $\delta$  wild-type and knockout mice.** A. Representative regions of isolectin B4-stained retinas from CAMKII $\gamma$  and  $\delta$  wild-type and knockout mice imaged at the level of the superficial vascular plexus. Scale bars = 100 $\mu\text{m}$ . B. Quantification of total vessel length, branching index (number of junctions per  $\text{mm}^2$ ) and lacunarity among the different groups of animals calculated using AngioTool software. Data information: data represent mean  $\pm$  SEM; n=3 mice per group.

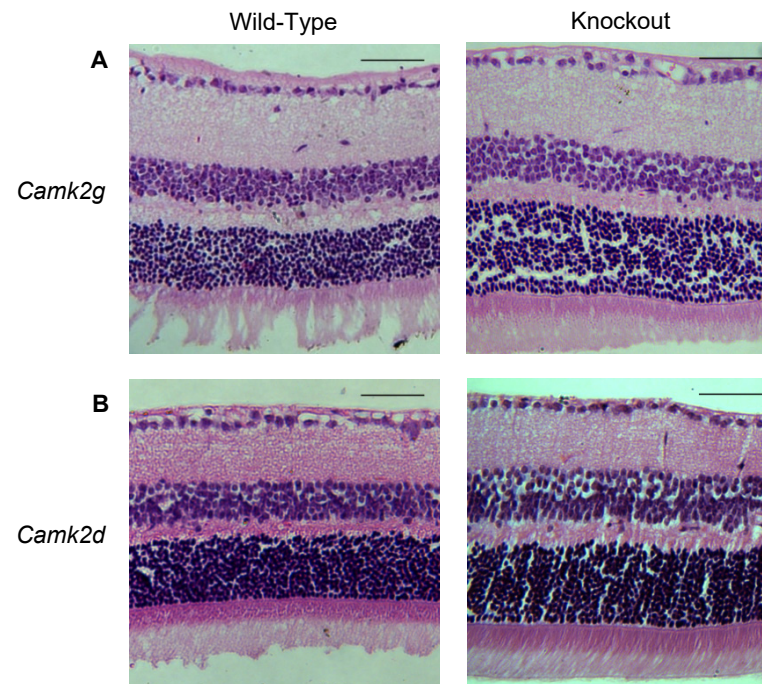

**Supplementary Figure 3. Gross retinal morphology in adult  $\text{Ca}^{2+}$ /calmodulin-dependent kinase II (CAMKII)  $\gamma$  and  $\delta$  wild-type and knockout mice.** A, B. Eyecups were fixed, embedded in paraffin, cut at  $5\mu\text{m}$  and stained with haematoxylin and eosin to visualise the gross structural morphology of the retina. Retinal morphology appeared normal in both the wild-type and knockout mice. Data information: images are representative of retinal sections from 6 animals in each group. Scale bars =  $50\mu\text{m}$ .

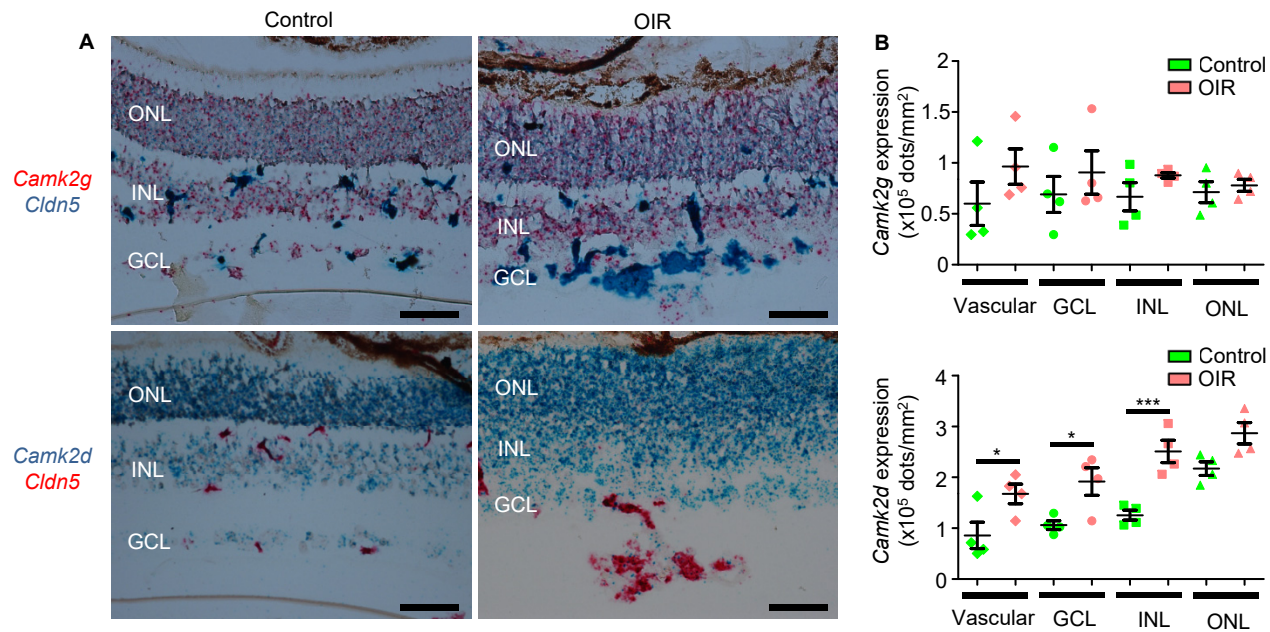

**Supplementary Figure 4. Cellular localisation of Ca<sup>2+</sup>/calmodulin-dependent kinase II (CAMKII)  $\gamma$  and  $\delta$  mRNA in the normal and ischemic retina.** A. Representative RNAscope in situ hybridization images of *Camk2g* (top panels, red) and *Camk2d* (bottom panels, blue) in retinal sections from P15 control (normoxic) and oxygen-induced retinopathy mice. Retinal sections were co-labelled using RNAscope probes against *Cldn5* (top panels, blue; bottom panels, red) to mark the vascular endothelial cells. GCL, ganglion cell layer; INL, inner nuclear layer; ONL, outer nuclear layer. Scale bars = 50 $\mu$ m. B. Scatter dot plot showing *Camk2g* (top panel) and *Camk2d* (bottom panel) mRNA expression in selected retinal regions presented as the average number of RNAscope dots per mm<sup>2</sup> of tissue. Data information: data represent mean  $\pm$  SEM; \*  $p < 0.05$ , \*\*\*  $p < 0.001$  based on ANOVA.  $n = 4$  mice per group.

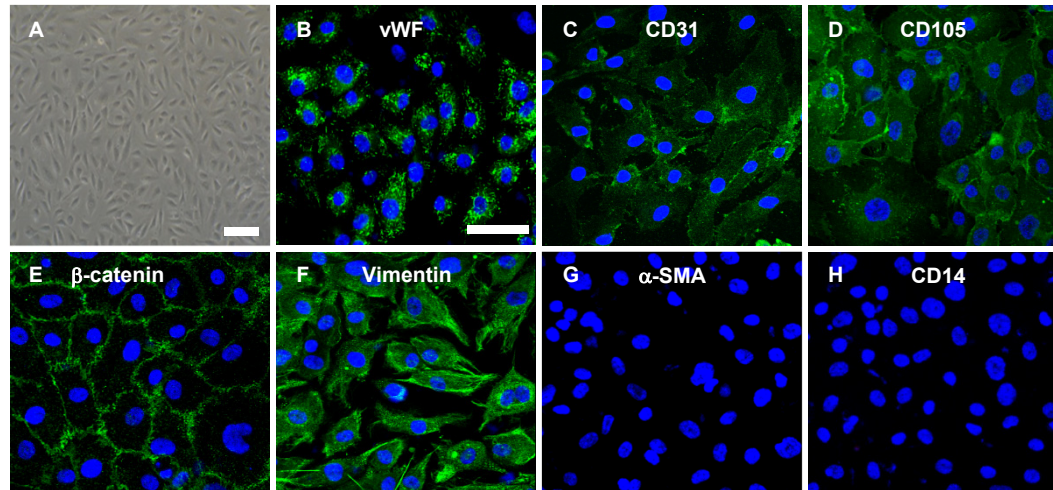

**Supplementary Figure 5. Confirmation of endothelial characteristics of primary human retinal microvascular endothelial cells (HRMECs).** A. HRMECs display the typical morphology of cultured endothelial cells when viewed under phase contrast microscopy. B-F. Immunolabelling studies confirmed that HRMECs represent a homogenous population of cells with endothelial characteristics. Granular cytoplasmic staining for von Willebrand factor (vWF) was observed (B). CD31 (PECAM-1) staining was seen primarily on borders between endothelial cells (C) and proliferating HRMECs exhibited cytoplasmic CD105 (endoglin) staining (D). They also formed adherens junctions as indicated by membrane localisation of  $\beta$ -catenin (E) and were positive for the intermediate filament cytoskeletal marker vimentin (F). G, H. Alpha-smooth muscle actin ( $\alpha$ -SMA; G) and CD14 (H) were absent, suggesting no contamination by smooth muscle cells or macrophages. Data information: images of representative of 3 biological replicates. Scale bars: 100 $\mu$ m.

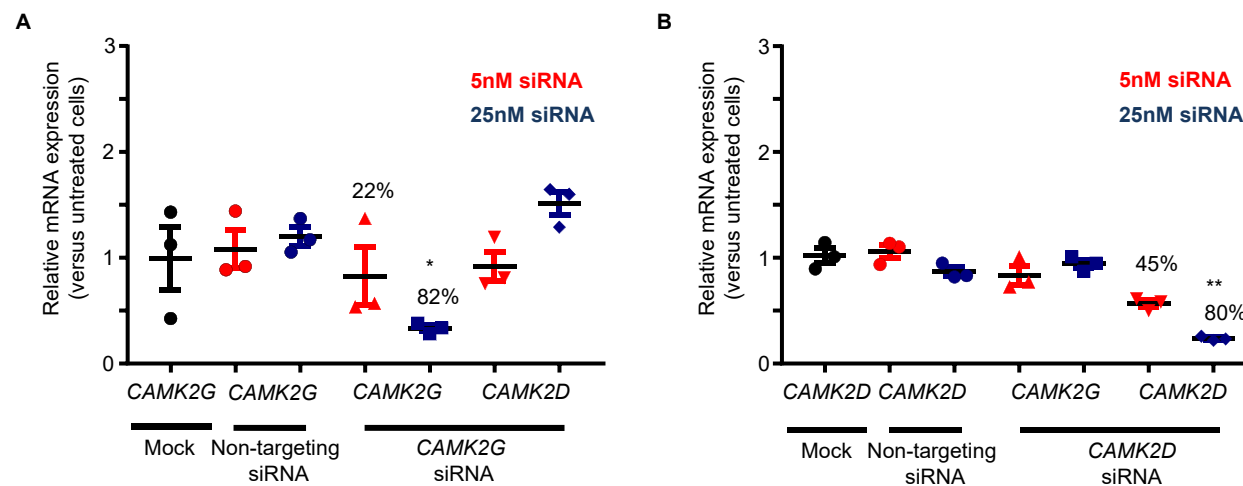

**Supplementary Figure 6. Silencing of CAMKII $\gamma$  and  $\delta$  isoforms in human retinal microvascular endothelial cells (HRMECs).** A, B. HRMECs were either mock transfected or transfected with 5 or 25nM non-targeting, *CAMK2G* (A) or *CAMK2D* (B) siRNAs. *CAMK2G* and *CAMK2D* mRNA transcripts were quantified 24 hours later by qPCR (normalised to *GAPDH*) and data expressed relative to untreated (control) cells. 25nM siRNA was required for effective knockdown of *CAMK2G* and *CAMK2D* isoforms. Silencing one isoform had no significant effect on the expression of the other. Data information: data represent mean  $\pm$  SEM; \*  $p < 0.05$ , \*\*  $p < 0.01$  based on ANOVA.  $n = 3$  biological and 3 technical replicates.

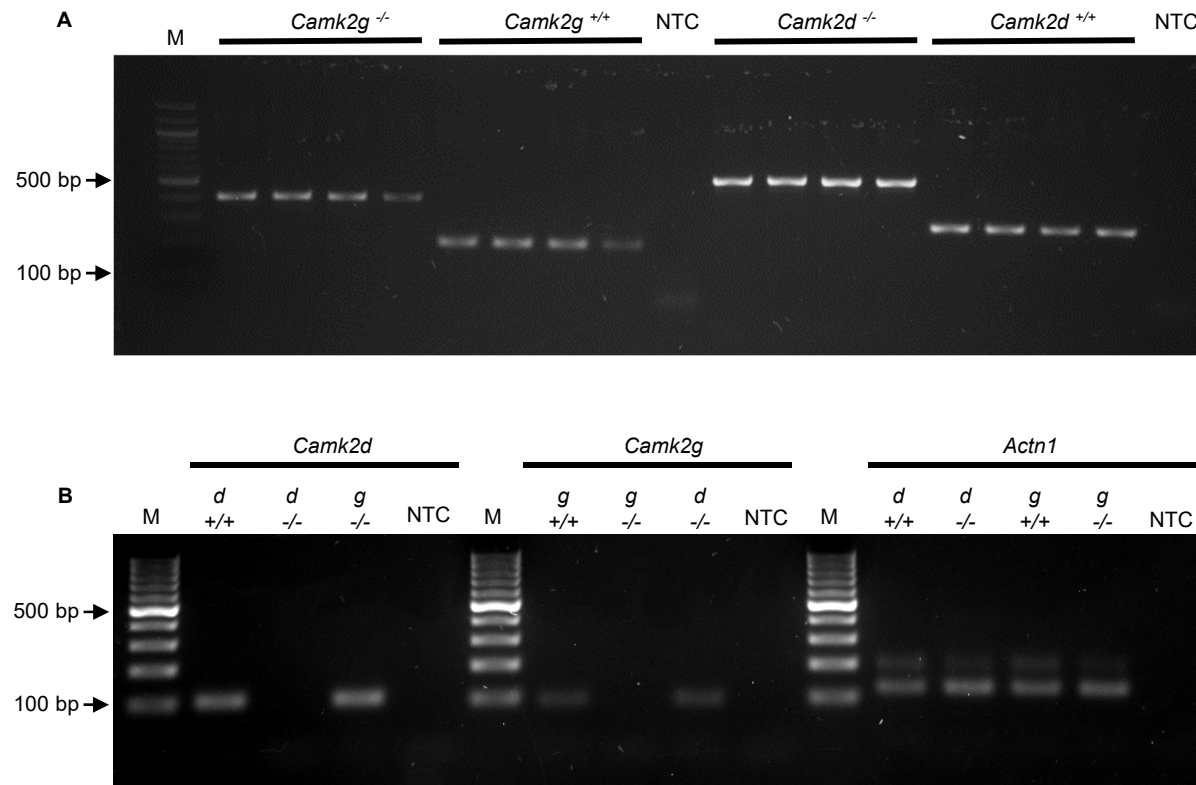

**Supplementary Figure 7. Genotyping and validation of retinal gene deletion in Ca<sup>2+</sup>/calmodulin-dependent kinase II (CAMKII)  $\gamma$  and  $\delta$  knockout mice.** A. Representative genotyping gel of DNA from ear biopsies of CAMKII $\gamma$  and  $\delta$  homozygous knockout and wild-type mice. Each lane represents an individual animal. The lengths of the PCR products were as expected based on the primer sets used (see Methods). B. RT-PCR analysis of total RNA extracted from the retinas of CAMKII $\gamma$  and  $\delta$  wild-type and homozygous knockout mice. CAMKII $\gamma$  and  $\delta$  bands were absent in the respective gene knockout mice. Expression of *Actn1* (Actinin-1) was used as a positive control for the PCR reaction. In both gels, "M" refers to the molecular weight marker lane and "NTC" to no template controls, where PCR-grade water was substituted for the template.

| Kinase                   | Site                 | VEGF        | VEGF+KN92   | VEGF+KN93   | VEGF vs Control | VEGF vs VEGF+KN92 | VEGF vs VEGF+KN93 |
|--------------------------|----------------------|-------------|-------------|-------------|-----------------|-------------------|-------------------|
|                          |                      | Fold change | Fold change | Fold change | P               | P                 | P                 |
| Akt 1/2/3                | S473                 | 1.68        | 1.79        | 1.39        | P < 0.001       | P > 0.05          | P < 0.001         |
| Akt 1/2/3                | T308                 | 0.91        | 0.89        | 1.04        | P > 0.05        | P > 0.05          | P > 0.05          |
| AMPK $\alpha$ 1          | T183                 | 1.37        | 1.49        | 1.31        | P < 0.001       | P > 0.05          | P > 0.05          |
| AMPK $\alpha$ 2          | T172                 | 1.30        | 1.32        | 1.27        | P > 0.05        | P > 0.05          | P > 0.05          |
| Chk-2                    | T68                  | 1.58        | 1.33        | 1.24        | P < 0.001       | P < 0.01          | P < 0.01          |
| c-Jun                    | S63                  | 0.84        | 0.81        | 1.00        | P > 0.05        | P > 0.05          | P > 0.05          |
| CREB                     | S133                 | 1.58        | 1.25        | 1.34        | P < 0.01        | P > 0.05          | P > 0.05          |
| EGF R                    | Y1086                | 2.08        | 1.76        | 1.44        | P < 0.05        | P > 0.05          | P > 0.05          |
| eNOS                     | S1177                | 0.88        | 0.84        | 1.15        | P > 0.05        | P > 0.05          | P > 0.05          |
| ERK1/2                   | T202/Y204, T185/Y187 | 1.31        | 1.37        | 1.23        | P > 0.05        | P > 0.05          | P > 0.05          |
| FAK                      | Y397                 | 1.57        | 1.49        | 1.17        | P < 0.001       | P > 0.05          | P < 0.01          |
| Fgr                      | Y412                 | 1.46        | 1.42        | 1.17        | P > 0.05        | P > 0.05          | P > 0.05          |
| Fyn                      | Y420                 | 1.29        | 1.25        | 1.10        | P > 0.05        | P > 0.05          | P > 0.05          |
| GSK-3 $\alpha$ / $\beta$ | S21/S9               | 1.20        | 1.17        | 1.21        | P > 0.05        | P > 0.05          | P > 0.05          |
| Hck                      | Y411                 | 1.35        | 1.28        | 1.08        | P > 0.05        | P > 0.05          | P > 0.05          |
| HSP27                    | S78/S82              | 1.64        | 1.57        | 1.34        | P < 0.01        | P > 0.05          | P > 0.05          |
| HSP60                    | -                    | 0.90        | 1.11        | 0.97        | P > 0.05        | P > 0.05          | P > 0.05          |
| JNK 1/2/3                | T183/Y185, T221/Y223 | 1.44        | 1.46        | 1.13        | P < 0.001       | P > 0.05          | P < 0.01          |
| Lck                      | Y394                 | 1.41        | 1.26        | 1.14        | P < 0.05        | P > 0.05          | P > 0.05          |
| Lyn                      | Y397                 | 1.26        | 1.11        | 1.10        | P > 0.05        | P > 0.05          | P > 0.05          |
| MSK1/2                   | S376/S360            | 1.44        | 1.41        | 1.18        | P > 0.05        | P > 0.05          | P > 0.05          |
| p27                      | T198                 | 1.08        | 1.14        | 1.55        | P > 0.05        | P > 0.05          | P > 0.05          |
| p38 $\alpha$             | T180/Y182            | 1.64        | 1.66        | 1.64        | P < 0.001       | P > 0.05          | P > 0.05          |
| p53                      | S392                 | 0.95        | 0.93        | 1.02        | P > 0.05        | P > 0.05          | P > 0.05          |
| p53                      | S15                  | 0.89        | 0.93        | 1.03        | P > 0.05        | P > 0.05          | P > 0.05          |
| p53                      | S46                  | 0.89        | 0.93        | 0.99        | P > 0.05        | P > 0.05          | P > 0.05          |
| p70 S6 Kinase            | T389                 | 1.02        | 0.93        | 1.39        | P > 0.05        | P > 0.05          | P > 0.05          |
| p70 S6 Kinase            | T421/S424            | 1.01        | 0.97        | 1.17        | P > 0.05        | P > 0.05          | P > 0.05          |
| PDGF R $\beta$           | Y751                 | 1.51        | 1.88        | 1.32        | P < 0.05        | P > 0.05          | P > 0.05          |
| PLC- $\gamma$ 1          | Y783                 | 0.85        | 0.83        | 1.07        | P > 0.05        | P > 0.05          | P > 0.05          |
| PRAS40                   | T246                 | 1.08        | 1.09        | 1.13        | P > 0.05        | P > 0.05          | P > 0.05          |
| PYK2                     | Y402                 | 0.95        | 0.98        | 0.87        | P > 0.05        | P > 0.05          | P > 0.05          |
| RSK 1/2/3                | S380/S386/S377       | 0.92        | 0.92        | 1.08        | P > 0.05        | P > 0.05          | P > 0.05          |
| Src                      | Y419                 | 1.41        | 1.32        | 1.13        | P < 0.01        | P > 0.05          | P < 0.05          |
| STAT2                    | Y689                 | 1.31        | 1.35        | 1.31        | P > 0.05        | P > 0.05          | P > 0.05          |
| STAT3                    | Y705                 | 1.62        | 1.41        | 2.23        | P > 0.05        | P > 0.05          | P > 0.05          |
| STAT3                    | S727                 | 1.50        | 1.31        | 1.82        | P > 0.05        | P > 0.05          | P > 0.05          |
| STAT5a                   | Y694                 | 1.33        | 1.37        | 1.30        | P > 0.05        | P > 0.05          | P > 0.05          |
| STAT5a/b                 | Y694/Y699            | 1.11        | 1.25        | 1.17        | P > 0.05        | P > 0.05          | P > 0.05          |
| STAT5b                   | Y699                 | 1.14        | 1.30        | 1.21        | P > 0.05        | P > 0.05          | P > 0.05          |
| STAT6                    | Y641                 | 1.19        | 1.25        | 1.19        | P > 0.05        | P > 0.05          | P > 0.05          |
| TOR                      | S2448                | 1.45        | 1.28        | 1.11        | P > 0.05        | P > 0.05          | P > 0.05          |
| WNK1                     | T60                  | 1.03        | 1.17        | 1.34        | P > 0.05        | P > 0.05          | P > 0.05          |
| Yes                      | Y426                 | 1.45        | 1.32        | 1.18        | P < 0.01        | P > 0.05          | P < 0.05          |
| $\beta$ -Catenin         | -                    | 1.56        | 1.54        | 1.22        | P < 0.001       | P > 0.05          | P < 0.05          |

**Supplementary Table 1. Summary of phospho-kinase array results.** The R&D Systems Human Phospho-Kinase Antibody Array detects the relative site specific phosphorylation of 43 kinases and 2 related total proteins (HSP60 and  $\beta$ -catenin). The normalised intensity for each antibody for human retinal microvascular endothelial cells exposed to VEGF in the absence or presence of KN93 or KN92 is presented as a fold change compared to untreated (control) cells. Statistical comparisons were performed using NIA Array Analysis software.
